# Supplementary material for: C. tropicalis promotes chemotherapy resistance in colon cancer through increasing lactate production to regulate the mismatch repair system
Source: PubMed Central journal article supplement (PMC8326116; doi:10.7150/ijbs.59262), 2021-07-02
Supplement: ijbsv17p2756s1.pdf [file ijbsv17p2756s1.pdf]

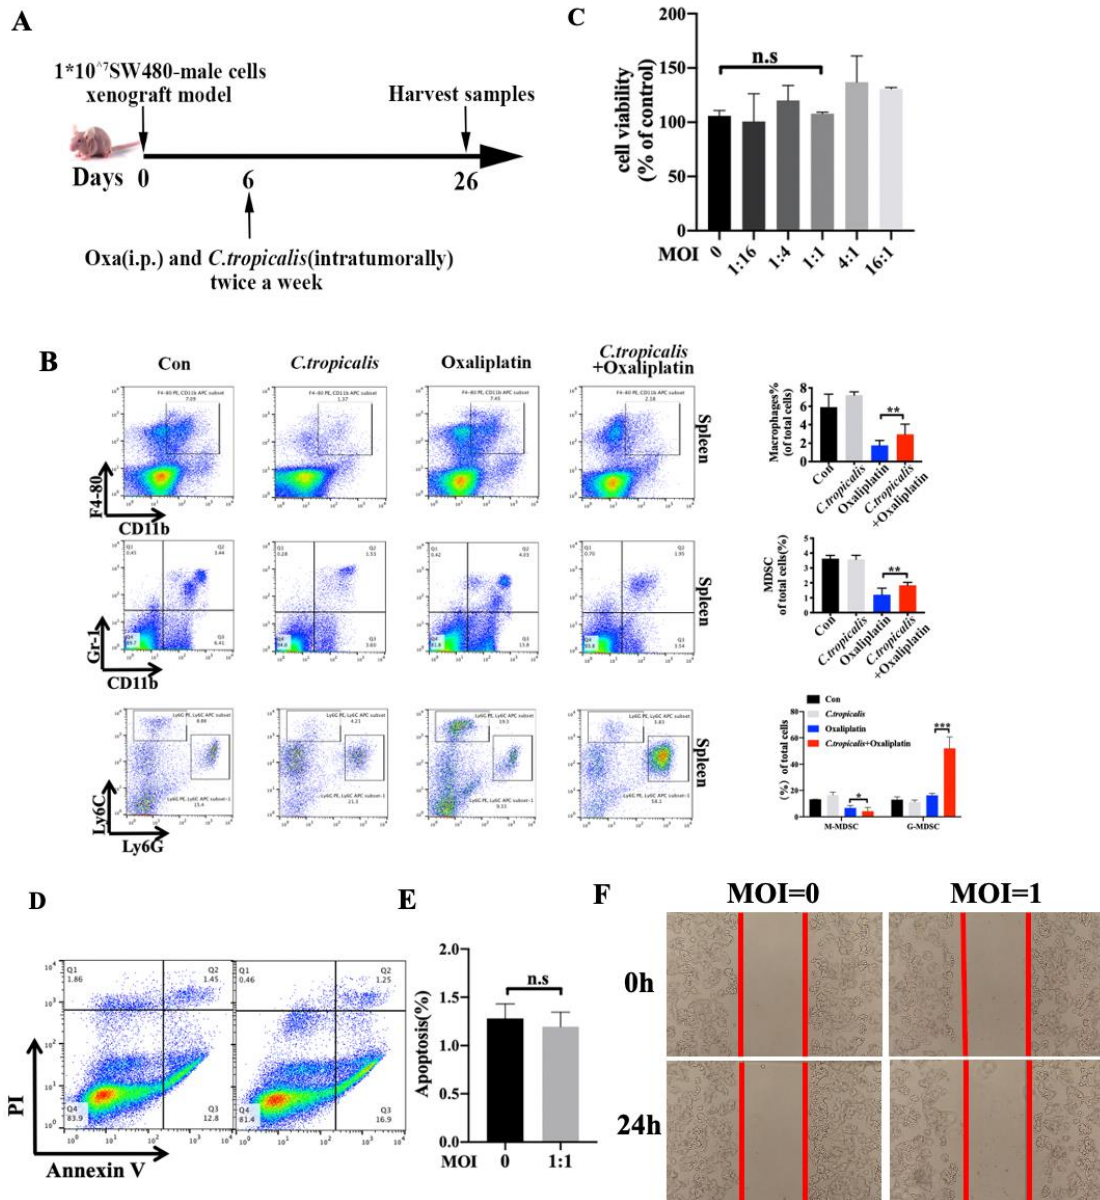

**Figure S1 *C. tropicalis* promotes the chemotherapy resistance of colon cancer to oxaliplatin in mouse xenograft tumor model.**

(A) Different treatment in mouse CRC xenograft model. (B) Proportions of macrophage (CD11b+F4/80+), MDSCs (CD11b+Gr-1+), G-MDSCs (CD11b+Ly6G+) and M-MDSCs (CD11b+Ly6C+) in spleen were detected by flow cytometry. (C) Cell viability was detected using CCK8 in SW480 co-cultured with different multiplicity of infection (MOI) of *C. tropicalis*. (D-E) Cell apoptosis was measured by flow cytometry in SW480 co-cultured with *C. tropicalis* (MOI = 1). (F) Wound Healing assay was performed to detect the cell migration in SW480 treated with MOI=1 *C. tropicalis*. Data with error bars are represented as mean  $\pm$  SD. Each panel is a representative experiment of at least three independent biological replicates. \* $p < 0.05$ , \*\* $p < 0.01$  and \*\*\* $p < 0.001$  as determined by unpaired Student's t test.

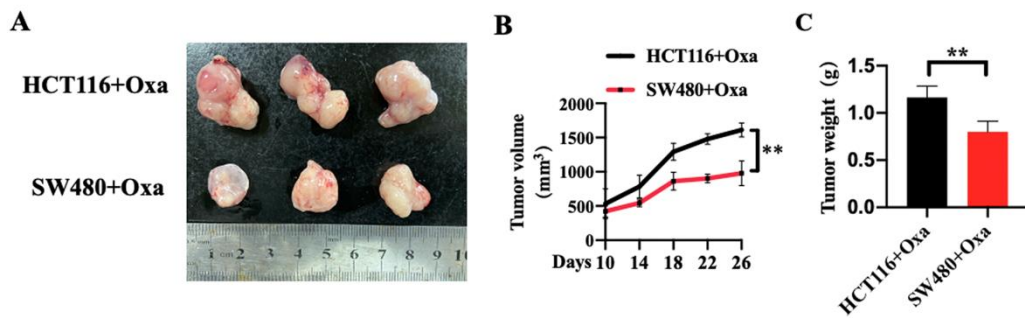

**Figure S2 MMR is inhibited in *C. tropicalis*-induced CRC chemotherapy resistance.**

(A) Representative image of tumors in mice injected with  $5 \times 10^6$  HCT116-male cells or  $1 \times 10^7$  SW480-male cells followed by oxaliplatin. (B and C) Statistical analysis of tumor volumes (B) and weights (C) in mice xenograft with HCT116 or SW480-male cells,  $n=3$ /group. Data with error bars are represented as mean  $\pm$  SD. Each panel is a representative experiment of at least three independent biological replicates.  $*p < 0.05$ ,  $**p < 0.01$  as determined by unpaired Student's t test.

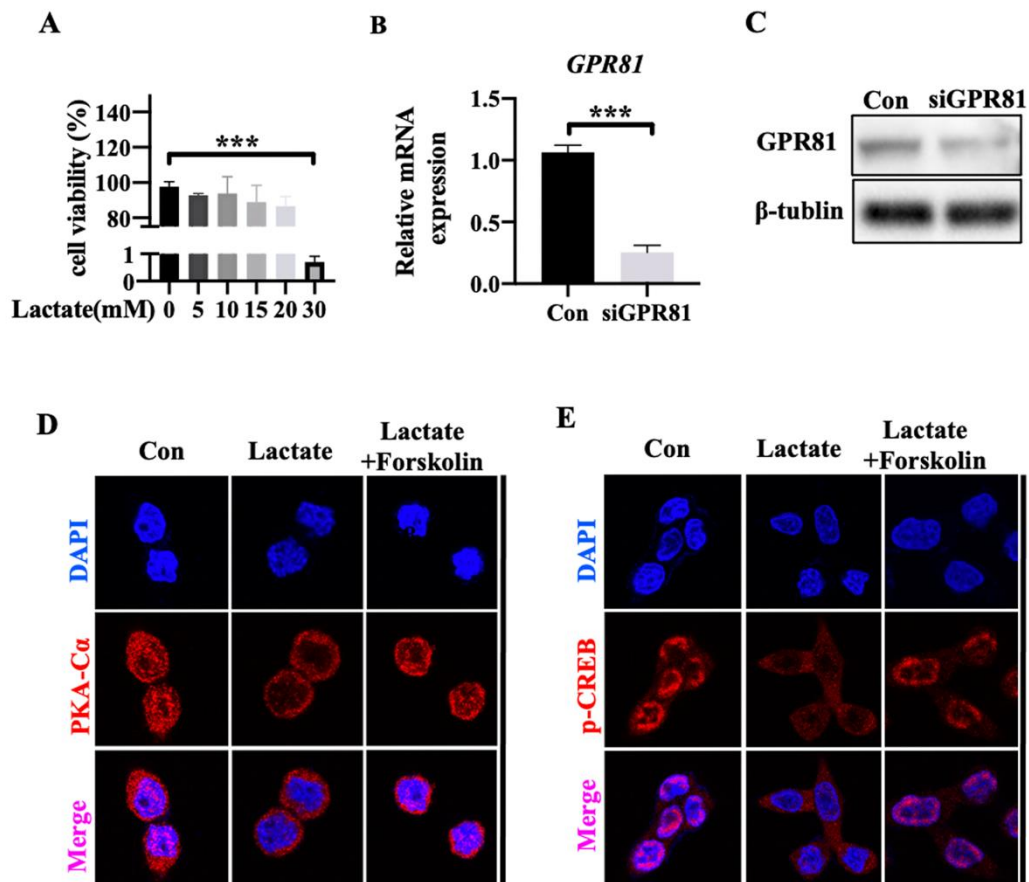

**Figure S3 Lactate reduces the expression of MLH1 via GPR81-cAMP-PKA-CREB axis.**

(A) Cell viability was detected using CCK8 in SW480 treated with different concentrations of lactate. (B-C) The knockdown function of GPR81 siRNA was verified by testing mRNA and protein levels of GPR81 in SW480. (D) The nucleus translocation of PKAC $\alpha$  in the SW480 cells treated with lactate and forskolin was detected by immunofluorescence. (E) The content of intranuclear p-CREB in lactate and forskolin-treated SW480 were tested by immunofluorescence. Data with error bars are represented as mean  $\pm$  SD. Each panel is a representative experiment of at least three independent biological replicates. \* $p$  < 0.05, \*\* $p$  < 0.01 and \*\*\* $p$  < 0.001 as determined by unpaired Student's t test.
